# Supplementary material for: A human forebrain organoid model reveals the essential function of GTF2IRD1-TTR-ERK axis for the neurodevelopmental deficits of Williams syndrome
Source: eLife journal article supplement (doi:10.7554/elife.98081), 2024-08-19
Supplement: supp3 [file elife-98081-supp3-v1.pdf]

| CHIP-qPCR |                       |
|-----------|-----------------------|
| GAPDH-Fw  | TCTGGTAACTCCGCCTTTGC  |
| GAPDH-Rv  | TACGGGATGGGTCTGAACGG  |
| TTR-1-Fw  | GACAGGTTCAAGCACGTCCA  |
| TTR-1-Rv  | GCTCCCCTTGAGGTGGATAAG |
| TTR-2-Fw  | TGCACTAGCATTAGCGAGCA  |
| TTR-2-Rv  | CTGCGGTGCCATAGCTTACA  |
| TTR-3-Fw  | ATCCTGCCCGACCTTTGACT  |
| TTR-3-Rv  | ACATGTTTGAACAGGGGCCG  |
| TTR-4-Fw  | TGTGTTAGACACAGGGTTGGG |
| TTR-4-Rv  | CTGCAGGCAGTGTCCATACCC |

| RT-PCR MOUSE |                              |
|--------------|------------------------------|
| GTF2IRD1-Fw  | TTCGTCCTCTAACCCAGAGTC        |
| GTF2IRD1-Rv  | ACAGAATTAGGGTGAAGTTC<br>GGA  |
| TTR-Fw       | TCGTAAGGAAAGACACTTGGC        |
| TTR-Rv       | CCAGAGTCGTTGGCTGTGAA         |
| GAPDH-Fw     | AGGTCGGTGTGAACGGATTG         |
| GAPDH-Rv     | TGTAGACCATGTAGTTGAGGT<br>CA  |
| GTF2I-Fw     | AAAGCCCTCCAATTTTCCTTTCA      |
| GTF2I-Rv     | TCCACACCTGATGCAGTAGTA        |
| RT-PCR human |                              |
| OCT3/4-Fw    | CCTCACTTCACTGCACTGTA         |
| OCT3/4-Rv    | CAGGTTTTCTTTCCCTAGCT         |
| KLF4-Fw      | GATGAACTGACCAGGCACTA         |
| KLF4-Rv      | GTGGGTCATATCCACTGTCT         |
| CMYC-Fw      | TGCCTCAAATTGGACTTTGG         |
| CMYC-Rv      | GATTGAAATTCTGTGTAAGT<br>C    |
| SOX2-Fw      | CCCAGCAGACTTCACATGT          |
| SOX2-Rv      | CCTCCATTTCCCTCGTTTT          |
| HES5-Fw      | AAGCACAGCAAAGCCTTCGTC        |
| HES5-Rv      | AGTAGCCTTCGCTGTAGTCCTG       |
| TBR1-Fw      | GAGGCAAATGGGTTCCCTTG         |
| TBR1-Rv      | TTTCTTGGCGCATCCAGTGA         |
| PAX6-Fw      | CCGAATTCTGCAGGTGTCCA         |
| PAX6-Rv      | GTCTGATGGAGCCAGTCTCG         |
| TBR2-Fw      | CTCACCAATAACAAAGGCGCA        |
| TBR2-Rv      | TGCAGTCGGGGTTGGTATTT         |
| CTIP2-Fw     | GATGACCACCTGCTCTCACC         |
| CTIP2-Rv     | GCTCATCTTTACCTGCAATGTT<br>CT |
| TTR-Fw       | CCGTGCATGTGTTTCAGAAAGG       |
| TTR-Rv       | AGCTCTCCAGACTCACTGGT         |

|          |                         |
|----------|-------------------------|
| GAPDH-Fw | GGAGCGAGATCCCTCCAAAAT   |
| GAPDH-Rv | GGCTGTTGTCATACTTCTCATGG |
| 18s-Fw   | CGGCTACCACATCCAAAGGA    |
| 18s-Rv   | GCTGGAATTACCGCGGCT      |
