# Supplementary material for: A human forebrain organoid model reveals the essential function of GTF2IRD1-TTR-ERK axis for the neurodevelopmental deficits of Williams syndrome
Source: eLife. 2024 Dec 13;13:RP98081. doi: 10.7554/eLife.98081 (PMC11643624; doi:10.7554/eLife.98081)
Supplement: Supplementary file 1. [file elife-98081-supp1.xlsx]

## Sheet: Sheet1
id	Symbol
ENSG00000169605	GKN1	up
ENSG00000166926	MS4A6E	up
ENSG00000274419	TBC1D3D	up
ENSG00000171116	HSFX1	up
ENSG00000146618	FERD3L	up
ENSG00000078399	HOXA9	up
ENSG00000120068	HOXB8	up
ENSG00000172179	PRL	up
ENSG00000182333	LIPF	up
ENSG00000205221	VIT	up
ENSG00000187553	CYP26C1	up
ENSG00000142178	SIK1	up
ENSG00000140368	PSTPIP1	up
ENSG00000108511	HOXB6	up
ENSG00000197757	HOXC6	up
ENSG00000269466	H3Y1	up
ENSG00000214415	GNAT3	up
ENSG00000106038	EVX1	up
ENSG00000229859	PGA3	up
ENSG00000229183	PGA4	up
ENSG00000108244	KRT23	up
ENSG00000283740	TAF11L11	up
ENSG00000166927	MS4A7	up
ENSG00000204449	TRIM49C	up
ENSG00000134398	ERN2	up
ENSG00000137078	SIT1	up
ENSG00000109511	ANXA10	up
ENSG00000166928	MS4A14	up
ENSG00000096088	PGC	up
ENSG00000162896	PIGR	up
ENSG00000288208	-	up
ENSG00000213809	KLRK1	up
ENSG00000167941	SOST	up
ENSG00000161609	KASH5	up
ENSG00000120094	HOXB1	up
ENSG00000185686	PRAME	up
ENSG00000256713	PGA5	up
ENSG00000168930	TRIM49	up
ENSG00000268964	ERVV-2	up
ENSG00000196604	POTEF	up
ENSG00000163286	ALPG	up
ENSG00000106034	CPED1	up
ENSG00000135100	HNF1A	up
ENSG00000253293	HOXA10	up
ENSG00000095596	CYP26A1	up
ENSG00000125084	WNT1	up
ENSG00000187821	HELT	up
ENSG00000147869	CER1	up
ENSG00000258484	SPESP1	up
ENSG00000143107	FNDC7	up
ENSG00000174279	EVX2	up
ENSG00000106013	ANKRD7	up
ENSG00000134443	GRP	up
ENSG00000102359	SRPX2	up
ENSG00000154646	TMPRSS15	up
ENSG00000178726	THBD	up
ENSG00000233802	TRIM49D2	up
ENSG00000093072	ADA2	up
ENSG00000079689	SCGN	up
ENSG00000168542	COL3A1	up
ENSG00000105675	ATP4A	up
ENSG00000170577	SIX2	up
ENSG00000135960	EDAR	up
ENSG00000146250	PRSS35	up
ENSG00000184937	WT1	up
ENSG00000075651	PLD1	up
ENSG00000285976	-	up
ENSG00000204219	TCEA3	up
ENSG00000196834	POTEI	up
ENSG00000188263	IL17REL	up
ENSG00000112175	BMP5	up
ENSG00000188467	SLC24A5	up
ENSG00000174600	CMKLR1	up
ENSG00000142538	PTH2	up
ENSG00000143869	GDF7	up
ENSG00000170689	HOXB9	up
ENSG00000062096	ARSF	up
ENSG00000260802	SERTM2	up
ENSG00000111335	OAS2	up
ENSG00000176971	FIBIN	up
ENSG00000145888	GLRA1	up
ENSG00000260027	HOXB7	up
ENSG00000176692	FOXC2	up
ENSG00000109132	PHOX2B	up
ENSG00000197769	MAP1LC3C	up
ENSG00000185664	PMEL	up
ENSG00000006016	CRLF1	up
ENSG00000196126	HLA-DRB1	up
ENSG00000261787	TCF24	up
ENSG00000138722	MMRN1	up
ENSG00000010932	FMO1	up
ENSG00000172238	ATOH1	up
ENSG00000110077	MS4A6A	up
ENSG00000149633	KIAA1755	up
ENSG00000180509	KCNE1	up
ENSG00000089127	OAS1	up
ENSG00000140478	GOLGA6D	up
ENSG00000179776	CDH5	up
ENSG00000168631	MUCL3	up
ENSG00000182566	CLEC4G	up
ENSG00000149090	PAMR1	up
ENSG00000000005	TNMD	up
ENSG00000162843	WDR64	up
ENSG00000164326	CARTPT	up
ENSG00000136944	LMX1B	up
ENSG00000106809	OGN	up
ENSG00000177468	OLIG3	up
ENSG00000167332	OR51E2	up
ENSG00000080031	PTPRH	up
ENSG00000166959	MS4A8	up
ENSG00000077498	TYR	up
ENSG00000115267	IFIH1	up
ENSG00000187550	SBK2	up
ENSG00000132530	XAF1	up
ENSG00000166426	CRABP1	up
ENSG00000205038	PKHD1L1	up
ENSG00000068781	STON1-GTF2A1L	up
ENSG00000159387	IRX6	up
ENSG00000181418	DDN	up
ENSG00000107485	GATA3	up
ENSG00000176040	TMPRSS7	up
ENSG00000138061	CYP1B1	up
ENSG00000249967	-	up
ENSG00000131914	LIN28A	up
ENSG00000183273	CCDC60	up
ENSG00000157601	MX1	up
ENSG00000262481	TMEM256-PLSCR3	up
ENSG00000125492	BARHL1	up
ENSG00000143867	OSR1	up
ENSG00000102760	RGCC	up
ENSG00000184058	TBX1	up
ENSG00000262633	-	up
ENSG00000188175	HEPACAM2	up
ENSG00000268606	MAGEA2	up
ENSG00000131620	ANO1	up
ENSG00000175445	LPL	up
ENSG00000184988	TMEM106A	up
ENSG00000177508	IRX3	up
ENSG00000178297	TMPRSS9	up
ENSG00000164692	COL1A2	up
ENSG00000133110	POSTN	up
ENSG00000162621	LRRC53	up
ENSG00000010310	GIPR	up
ENSG00000187608	ISG15	up
ENSG00000185559	DLK1	up
ENSG00000144010	TRIM43B	up
ENSG00000176842	IRX5	up
ENSG00000205413	SAMD9	up
ENSG00000276600	RAB7B	up
ENSG00000172005	MAL	up
ENSG00000115648	MLPH	up
ENSG00000143032	BARHL2	up
ENSG00000130528	HRC	up
ENSG00000188219	POTEE	up
ENSG00000133115	STOML3	up
ENSG00000162998	FRZB	up
ENSG00000173157	ADAMTS20	up
ENSG00000173068	BNC2	up
ENSG00000005102	MEOX1	up
ENSG00000145244	CORIN	up
ENSG00000159263	SIM2	up
ENSG00000185739	SRL	up
ENSG00000268916	CSAG3	up
ENSG00000007171	NOS2	up
ENSG00000066056	TIE1	up
ENSG00000157399	ARSL	up
ENSG00000105392	CRX	up
ENSG00000189060	H1-0	up
ENSG00000139304	PTPRQ	up
ENSG00000184254	ALDH1A3	up
ENSG00000204252	HLA-DOA	up
ENSG00000163359	COL6A3	up
ENSG00000107593	PKD2L1	up
ENSG00000119125	GDA	up
ENSG00000009709	PAX7	up
ENSG00000163347	CLDN1	up
ENSG00000274933	TBC1D3I	up
ENSG00000266524	GDF10	up
ENSG00000184486	POU3F2	up
ENSG00000121858	TNFSF10	up
ENSG00000182759	MAFA	up
ENSG00000183287	CCBE1	up
ENSG00000183801	OLFML1	up
ENSG00000198759	EGFL6	up
ENSG00000108379	WNT3	up
ENSG00000111058	ACSS3	up
ENSG00000159231	CBR3	up
ENSG00000123338	NCKAP1L	up
ENSG00000185668	POU3F1	up
ENSG00000104321	TRPA1	up
ENSG00000112837	TBX18	up
ENSG00000168779	SHOX2	up
ENSG00000100206	DMC1	up
ENSG00000269891	ARHGAP19-SLIT1	up
ENSG00000163909	HEYL	up
ENSG00000154188	ANGPT1	up
ENSG00000163377	TAFA4	up
ENSG00000166888	STAT6	up
ENSG00000054598	FOXC1	up
ENSG00000102755	FLT1	up
ENSG00000196091	MYBPC1	up
ENSG00000122367	LDB3	up
ENSG00000124205	EDN3	up
ENSG00000152137	HSPB8	up
ENSG00000168267	PTF1A	up
ENSG00000162367	TAL1	up
ENSG00000250709	CCDC169-SOHLH2	up
ENSG00000134115	CNTN6	up
ENSG00000186051	TAL2	up
ENSG00000138435	CHRNA1	up
ENSG00000109991	P2RX3	up
ENSG00000101680	LAMA1	up
ENSG00000185960	SHOX	up
ENSG00000091986	CCDC80	up
ENSG00000102924	CBLN1	up
ENSG00000174963	ZIC4	up
ENSG00000234444	ZNF736	up
ENSG00000179344	HLA-DQB1	up
ENSG00000164330	EBF1	up
ENSG00000137801	THBS1	up
ENSG00000075884	ARHGAP15	up
ENSG00000120088	CRHR1	up
ENSG00000205403	CFI	up
ENSG00000068976	PYGM	up
ENSG00000170893	TRH	up
ENSG00000162039	MEIOB	up
ENSG00000155542	SETD9	up
ENSG00000187720	THSD4	up
ENSG00000123307	NEUROD4	up
ENSG00000165092	ALDH1A1	up
ENSG00000154065	ANKRD29	up
ENSG00000135903	PAX3	up
ENSG00000182718	ANXA2	up
ENSG00000111348	ARHGDIB	up
ENSG00000156466	GDF6	up
ENSG00000166415	WDR72	up
ENSG00000021826	CPS1	up
ENSG00000116132	PRRX1	up
ENSG00000180176	TH	up
ENSG00000213928	IRF9	up
ENSG00000154783	FGD5	up
ENSG00000178033	CALHM5	up
ENSG00000008197	TFAP2D	up
ENSG00000175356	SCUBE2	up
ENSG00000054219	LY75	up
ENSG00000120075	HOXB5	up
ENSG00000236782	ZNF593OS	up
ENSG00000123405	NFE2	up
ENSG00000066185	ZMYND12	up
ENSG00000113946	CLDN16	up
ENSG00000145936	KCNMB1	up
ENSG00000102174	PHEX	up
ENSG00000170006	TMEM154	up
ENSG00000101017	CD40	up
ENSG00000130711	PRDM12	up
ENSG00000114654	EFCC1	up
ENSG00000146013	GFRA3	up
ENSG00000174950	CD164L2	up
ENSG00000152977	ZIC1	up
ENSG00000214336	FOXI3	up
ENSG00000187140	FOXD3	up
ENSG00000122254	HS3ST2	up
ENSG00000188313	PLSCR1	up
ENSG00000205927	OLIG2	up
ENSG00000170421	KRT8	up
ENSG00000152580	IGSF10	up
ENSG00000114529	C3orf52	up
ENSG00000170571	EMB	up
ENSG00000188152	NUTM2G	up
ENSG00000179869	ABCA13	up
ENSG00000004468	CD38	up
ENSG00000120332	TNN	up
ENSG00000101188	NTSR1	up
ENSG00000180613	GSX2	up
ENSG00000138829	FBN2	up
ENSG00000185745	IFIT1	up
ENSG00000139626	ITGB7	up
ENSG00000118322	ATP10B	up
ENSG00000121236	TRIM6	up
ENSG00000197893	NRAP	up
ENSG00000110375	UPK2	up
ENSG00000206538	VGLL3	up
ENSG00000215187	FAM166B	up
ENSG00000116774	OLFML3	up
ENSG00000121039	RDH10	up
ENSG00000003989	SLC7A2	up
ENSG00000186367	MINAR2	up
ENSG00000168899	VAMP5	up
ENSG00000165949	IFI27	up
ENSG00000100060	MFNG	up
ENSG00000152583	SPARCL1	up
ENSG00000064655	EYA2	up
ENSG00000248713	C4orf54	up
ENSG00000139329	LUM	up
ENSG00000162620	LRRIQ3	up
ENSG00000134595	SOX3	up
ENSG00000169884	WNT10B	up
ENSG00000166743	ACSM1	up
ENSG00000123243	ITIH5	up
ENSG00000151615	POU4F2	up
ENSG00000018408	WWTR1	up
ENSG00000136960	ENPP2	up
ENSG00000044524	EPHA3	up
ENSG00000171345	KRT19	up
ENSG00000269113	TRABD2B	up
ENSG00000104722	NEFM	up
ENSG00000064989	CALCRL	up
ENSG00000111432	FZD10	up
ENSG00000132205	EMILIN2	up
ENSG00000133475	GGT2	up
ENSG00000101825	MXRA5	up
ENSG00000176907	TCIM	up
ENSG00000176387	HSD11B2	up
ENSG00000274252	GGTLC3	up
ENSG00000146147	MLIP	up
ENSG00000126259	KIRREL2	up
ENSG00000181541	MAB21L2	up
ENSG00000154342	WNT3A	up
ENSG00000156427	FGF18	up
ENSG00000179348	GATA2	up
ENSG00000196767	POU3F4	up
ENSG00000154864	PIEZO2	up
ENSG00000141338	ABCA8	up
ENSG00000277149	TYW1B	up
ENSG00000135269	TES	up
ENSG00000215845	TSTD1	up
ENSG00000156689	GLYATL2	up
ENSG00000205683	DPF3	up
ENSG00000197587	DMBX1	up
ENSG00000143355	LHX9	up
ENSG00000134917	ADAMTS8	up
ENSG00000070748	CHAT	up
ENSG00000165462	PHOX2A	up
ENSG00000005187	ACSM3	up
ENSG00000134343	ANO3	up
ENSG00000165985	C1QL3	up
ENSG00000184221	OLIG1	up
ENSG00000003137	CYP26B1	up
ENSG00000010704	HFE	up
ENSG00000198796	ALPK2	up
ENSG00000162552	WNT4	up
ENSG00000198959	TGM2	up
ENSG00000221963	APOL6	up
ENSG00000177989	ODF3B	up
ENSG00000135406	PRPH	up
ENSG00000166317	SYNPO2L	up
ENSG00000214491	SEC14L6	up
ENSG00000054277	OPN3	up
ENSG00000173404	INSM1	up
ENSG00000053328	METTL24	up
ENSG00000188641	DPYD	up
ENSG00000153246	PLA2R1	up
ENSG00000126709	IFI6	up
ENSG00000143882	ATP6V1C2	up
ENSG00000277586	NEFL	up
ENSG00000139269	INHBE	up
ENSG00000061455	PRDM6	up
ENSG00000165983	PTER	up
ENSG00000064300	NGFR	up
ENSG00000061656	SPAG4	up
ENSG00000036565	SLC18A1	up
ENSG00000111331	OAS3	up
ENSG00000196092	PAX5	up
ENSG00000137166	FOXP4	up
ENSG00000165118	C9orf64	up
ENSG00000186197	EDARADD	up
ENSG00000087116	ADAMTS2	up
ENSG00000120903	CHRNA2	up
ENSG00000081479	LRP2	up
ENSG00000255104	-	up
ENSG00000164761	TNFRSF11B	up
ENSG00000028116	VRK2	up
ENSG00000149256	TENM4	up
ENSG00000157322	CLEC18A	up
ENSG00000145536	ADAMTS16	up
ENSG00000154330	PGM5	up
ENSG00000250264	-	up
ENSG00000273213	H3-2	up
ENSG00000272196	H2AC19	up
ENSG00000136732	GYPC	up
ENSG00000169252	ADRB2	up
ENSG00000102362	SYTL4	up
ENSG00000167925	GHDC	up
ENSG00000230453	ANKRD18B	up
ENSG00000171595	DNAI2	up
ENSG00000145808	ADAMTS19	up
ENSG00000164438	TLX3	up
ENSG00000119917	IFIT3	up
ENSG00000256463	SALL3	up
ENSG00000196502	SULT1A1	up
ENSG00000183762	KREMEN1	up
ENSG00000165606	DRGX	up
ENSG00000102195	GPR50	up
ENSG00000105479	ODAD1	up
ENSG00000101198	NKAIN4	up
ENSG00000187017	ESPN	up
ENSG00000164972	C9orf24	up
ENSG00000133107	TRPC4	up
ENSG00000107249	GLIS3	up
ENSG00000182890	GLUD2	up
ENSG00000141449	GREB1L	up
ENSG00000151773	CCDC122	up
ENSG00000184895	SRY	up
ENSG00000196890	H2BU1	up
ENSG00000239389	PCDHA13	up
ENSG00000255150	EID3	up
ENSG00000197415	VEPH1	up
ENSG00000183840	GPR39	up
ENSG00000135333	EPHA7	up
ENSG00000171786	NHLH1	up
ENSG00000177301	KCNA2	up
ENSG00000188729	OSTN	up
ENSG00000001626	CFTR	up
ENSG00000090932	DLL3	up
ENSG00000184144	CNTN2	up
ENSG00000163840	DTX3L	up
ENSG00000138798	EGF	up
ENSG00000112414	ADGRG6	up
ENSG00000145423	SFRP2	up
ENSG00000139219	COL2A1	up
ENSG00000107796	ACTA2	up
ENSG00000152760	DYNLT5	up
ENSG00000139988	RDH12	up
ENSG00000156675	RAB11FIP1	up
ENSG00000164946	FREM1	up
ENSG00000065534	MYLK	up
ENSG00000214814	FER1L6	up
ENSG00000186862	PDZD7	up
ENSG00000080644	CHRNA3	up
ENSG00000160712	IL6R	up
ENSG00000198963	RORB	up
ENSG00000048545	GUCA1A	up
ENSG00000011422	PLAUR	up
ENSG00000271824	SMIM32	up
ENSG00000137142	IGFBPL1	up
ENSG00000123560	PLP1	up
ENSG00000138496	PARP9	up
ENSG00000163735	CXCL5	up
ENSG00000153790	C7orf31	up
ENSG00000147065	MSN	up
ENSG00000163191	S100A11	up
ENSG00000105894	PTN	up
ENSG00000153029	MR1	up
ENSG00000106689	LHX2	up
ENSG00000087589	CASS4	up
ENSG00000221818	EBF2	up
ENSG00000164778	EN2	up
ENSG00000180660	MAB21L1	up
ENSG00000144834	TAGLN3	up
ENSG00000167553	TUBA1C	up
ENSG00000149243	KLHL35	up
ENSG00000151012	SLC7A11	up
ENSG00000099337	KCNK6	up
ENSG00000144550	CPNE9	up
ENSG00000171428	NAT1	up
ENSG00000125945	ZNF436	up
ENSG00000169174	PCSK9	up
ENSG00000164451	CALHM4	up
ENSG00000069018	TRPC7	up
ENSG00000146530	VWDE	up
ENSG00000105810	CDK6	up
ENSG00000127863	TNFRSF19	up
ENSG00000135905	DOCK10	up
ENSG00000171956	FOXB1	up
ENSG00000163661	PTX3	up
ENSG00000180592	SKIDA1	up
ENSG00000140092	FBLN5	up
ENSG00000129514	FOXA1	up
ENSG00000189184	PCDH18	up
ENSG00000181965	NEUROG1	up
ENSG00000106066	CPVL	up
ENSG00000104883	PEX11G	up
ENSG00000272573	MUSTN1	up
ENSG00000074370	ATP2A3	up
ENSG00000130055	GDPD2	up
ENSG00000167723	TRPV3	up
ENSG00000146574	CCZ1B	up
ENSG00000048540	LMO3	up
ENSG00000134138	MEIS2	up
ENSG00000134516	DOCK2	up
ENSG00000180447	GAS1	up
ENSG00000257108	NHLRC4	up
ENSG00000129151	BBOX1	up
ENSG00000106853	PTGR1	up
ENSG00000065361	ERBB3	up
ENSG00000139174	PRICKLE1	up
ENSG00000277075	H2AC8	up
ENSG00000183780	SLC35F3	up
ENSG00000166250	CLMP	up
ENSG00000101670	LIPG	up
ENSG00000134755	DSC2	up
ENSG00000109610	SOD3	up
ENSG00000185187	SIGIRR	up
ENSG00000128606	LRRC17	up
ENSG00000112769	LAMA4	up
ENSG00000138772	ANXA3	up
ENSG00000196169	KIF19	up
ENSG00000198435	NRARP	up
ENSG00000182103	FAM181B	up
ENSG00000152315	KCNK13	up
ENSG00000177551	NHLH2	up
ENSG00000143995	MEIS1	up
ENSG00000100918	REC8	up
ENSG00000273802	H2BC8	up
ENSG00000148834	GSTO1	up
ENSG00000164694	FNDC1	up
ENSG00000134013	LOXL2	up
ENSG00000164627	KIF6	up
ENSG00000215397	SCRT2	up
ENSG00000230062	ANKRD66	up
ENSG00000011638	TMEM159	up
ENSG00000005108	THSD7A	up
ENSG00000075223	SEMA3C	up
ENSG00000086991	NOX4	up
ENSG00000081237	PTPRC	up
ENSG00000079931	MOXD1	up
ENSG00000081803	CADPS2	up
ENSG00000140067	FAM181A	up
ENSG00000115507	OTX1	up
ENSG00000124302	CHST8	up
ENSG00000135828	RNASEL	up
ENSG00000198732	SMOC1	up
ENSG00000130775	THEMIS2	up
ENSG00000189120	SP6	up
ENSG00000078114	NEBL	up
ENSG00000157335	CLEC18C	up
ENSG00000132561	MATN2	up
ENSG00000157110	RBPMS	up
ENSG00000085276	MECOM	up
ENSG00000197921	HES5	up
ENSG00000158955	WNT9B	up
ENSG00000125355	TMEM255A	up
ENSG00000198049	AVPR1B	up
ENSG00000116990	MYCL	up
ENSG00000175556	LONRF3	up
ENSG00000125285	SOX21	up
ENSG00000234465	PINLYP	up
ENSG00000106078	COBL	up
ENSG00000163082	SGPP2	up
ENSG00000127920	GNG11	up
ENSG00000112902	SEMA5A	up
ENSG00000173917	HOXB2	up
ENSG00000182492	BGN	up
ENSG00000050555	LAMC3	up
ENSG00000183779	ZNF703	up
ENSG00000091664	SLC17A6	up
ENSG00000134215	VAV3	up
ENSG00000129757	CDKN1C	up
ENSG00000137959	IFI44L	up
ENSG00000154227	CERS3	up
ENSG00000139352	ASCL1	up
ENSG00000112183	RBM24	up
ENSG00000107201	DDX58	up
ENSG00000116711	PLA2G4A	up
ENSG00000273540	AGBL1	up
ENSG00000189283	FHIT	up
ENSG00000106823	ECM2	up
ENSG00000156925	ZIC3	up
ENSG00000258465	-	up
ENSG00000128652	HOXD3	up
ENSG00000204624	DISP3	up
ENSG00000165272	AQP3	up
ENSG00000149573	MPZL2	up
ENSG00000150361	KLHL1	up
ENSG00000169314	C22orf15	up
ENSG00000174136	RGMB	up
ENSG00000159176	CSRP1	up
ENSG00000132688	NES	up
ENSG00000134574	DDB2	up
ENSG00000069812	HES2	up
ENSG00000171119	NRTN	up
ENSG00000185483	ROR1	up
ENSG00000113296	THBS4	up
ENSG00000125246	CLYBL	up
ENSG00000159289	GOLGA6A	up
ENSG00000052850	ALX4	up
ENSG00000167081	PBX3	up
ENSG00000118508	RAB32	up
ENSG00000176928	GCNT4	up
ENSG00000121690	DEPDC7	up
ENSG00000141668	CBLN2	up
ENSG00000152214	RIT2	up
ENSG00000183145	RIPPLY3	up
ENSG00000114861	FOXP1	up
ENSG00000172995	ARPP21	up
ENSG00000183098	GPC6	up
ENSG00000108551	RASD1	up
ENSG00000112280	COL9A1	up
ENSG00000106003	LFNG	up
ENSG00000144485	HES6	up
ENSG00000164089	ETNPPL	up
ENSG00000163827	LRRC2	up
ENSG00000135678	CPM	up
ENSG00000080166	DCT	up
ENSG00000163623	NKX6-1	up
ENSG00000100302	RASD2	up
ENSG00000164649	CDCA7L	up
ENSG00000156535	CD109	up
ENSG00000121570	DPPA4	up
ENSG00000101384	JAG1	up
ENSG00000163545	NUAK2	up
ENSG00000076770	MBNL3	up
ENSG00000138119	MYOF	up
ENSG00000092969	TGFB2	up
ENSG00000185860	CCDC190	up
ENSG00000196132	MYT1	up
ENSG00000164659	ELAPOR2	up
ENSG00000164976	MYORG	up
ENSG00000115963	RND3	up
ENSG00000185359	HGS	up
ENSG00000142632	ARHGEF19	up
ENSG00000152192	POU4F1	up
ENSG00000106571	GLI3	up
ENSG00000154856	APCDD1	up
ENSG00000147571	CRH	up
ENSG00000162772	ATF3	up
ENSG00000152939	MARVELD2	up
ENSG00000170927	PKHD1	up
ENSG00000077238	IL4R	up
ENSG00000171722	SPATA46	up
ENSG00000150630	VEGFC	up
ENSG00000146648	EGFR	up
ENSG00000261308	FIGNL2	up
ENSG00000187714	SLC18A3	up
ENSG00000105974	CAV1	up
ENSG00000123453	SARDH	up
ENSG00000072201	LNX1	up
ENSG00000188290	HES4	up
ENSG00000039560	RAI14	up
ENSG00000169085	VXN	up
ENSG00000118420	UBE3D	up
ENSG00000144857	BOC	up
ENSG00000172014	ANKRD20A4P	up
ENSG00000100314	CABP7	up
ENSG00000257921	-	up
ENSG00000167771	RCOR2	up
ENSG00000109851	DBX1	up
ENSG00000088305	DNMT3B	up
ENSG00000115353	TACR1	up
ENSG00000115556	PLCD4	up
ENSG00000069696	DRD4	up
ENSG00000204103	MAFB	up
ENSG00000168938	PPIC	up
ENSG00000213719	CLIC1	up
ENSG00000135842	NIBAN1	up
ENSG00000183722	LHFPL6	up
ENSG00000120156	TEK	up
ENSG00000139890	REM2	up
ENSG00000162692	VCAM1	up
ENSG00000078549	ADCYAP1R1	up
ENSG00000008196	TFAP2B	up
ENSG00000108001	EBF3	up
ENSG00000197852	INKA2	up
ENSG00000106799	TGFBR1	up
ENSG00000180616	SSTR2	up
ENSG00000176014	TUBB6	up
ENSG00000197406	DIO3	up
ENSG00000160539	PLPP7	up
ENSG00000137691	CFAP300	up
ENSG00000111783	RFX4	up
ENSG00000125266	EFNB2	up
ENSG00000147488	ST18	up
ENSG00000104368	PLAT	up
ENSG00000165675	ENOX2	up
ENSG00000033170	FUT8	up
ENSG00000180573	H2AC6	up
ENSG00000166016	ABTB2	up
ENSG00000169436	COL22A1	up
ENSG00000136856	SLC2A8	up
ENSG00000143340	FAM163A	up
ENSG00000173930	SLCO4C1	up
ENSG00000140262	TCF12	up
ENSG00000064309	CDON	up
ENSG00000096060	FKBP5	up
ENSG00000139946	PELI2	up
ENSG00000175697	GPR156	up
ENSG00000168961	LGALS9	up
ENSG00000108830	RND2	up
ENSG00000130958	SLC35D2	up
ENSG00000158373	H2BC5	up
ENSG00000249158	PCDHA11	up
ENSG00000115415	STAT1	up
ENSG00000108018	SORCS1	up
ENSG00000156140	ADAMTS3	up
ENSG00000111728	ST8SIA1	up
ENSG00000171365	CLCN5	up
ENSG00000070882	OSBPL3	up
ENSG00000174137	FAM53A	up
ENSG00000174498	IGDCC3	up
ENSG00000162745	OLFML2B	up
ENSG00000156804	FBXO32	up
ENSG00000071205	ARHGAP10	up
ENSG00000198756	COLGALT2	up
ENSG00000130720	FIBCD1	up
ENSG00000114423	CBLB	up
ENSG00000173267	SNCG	up
ENSG00000103196	CRISPLD2	up
ENSG00000110628	SLC22A18	up
ENSG00000134569	LRP4	up
ENSG00000107165	TYRP1	up
ENSG00000164292	RHOBTB3	up
ENSG00000169908	TM4SF1	up
ENSG00000106018	VIPR2	up
ENSG00000021300	PLEKHB1	up
ENSG00000165695	AK8	up
ENSG00000147509	RGS20	up
ENSG00000103599	IQCH	up
ENSG00000114698	PLSCR4	up
ENSG00000105357	MYH14	up
ENSG00000091656	ZFHX4	up
ENSG00000205213	LGR4	up
ENSG00000147872	PLIN2	up
ENSG00000288637	-	up
ENSG00000101327	PDYN	up
ENSG00000119547	ONECUT2	up
ENSG00000116032	GRIN3B	up
ENSG00000114166	KAT2B	up
ENSG00000046653	GPM6B	up
ENSG00000189171	S100A13	up
ENSG00000121769	FABP3	up
ENSG00000181585	TMIE	up
ENSG00000178078	STAP2	up
ENSG00000183386	FHL3	up
ENSG00000127578	WFIKKN1	up
ENSG00000099139	PCSK5	up
ENSG00000112186	CAP2	up
ENSG00000166086	JAM3	up
ENSG00000272398	CD24	up
ENSG00000143578	CREB3L4	up
ENSG00000112238	PRDM13	up
ENSG00000166407	LMO1	up
ENSG00000061337	LZTS1	up
ENSG00000135299	ANKRD6	up
ENSG00000106633	GCK	up
ENSG00000069535	MAOB	up
ENSG00000125354	SEPTIN6	up
ENSG00000170430	MGMT	up
ENSG00000198848	CES1	up
ENSG00000180875	GREM2	up
ENSG00000107611	CUBN	up
ENSG00000046889	PREX2	up
ENSG00000172789	HOXC5	up
ENSG00000139083	ETV6	up
ENSG00000018625	ATP1A2	up
ENSG00000056487	PHF21B	up
ENSG00000106025	TSPAN12	up
ENSG00000108821	COL1A1	up
ENSG00000136160	EDNRB	up
ENSG00000107521	HPS1	up
ENSG00000165966	PDZRN4	up
ENSG00000140807	NKD1	up
ENSG00000121957	GPSM2	up
ENSG00000159713	TPPP3	up
ENSG00000019582	CD74	up
ENSG00000074527	NTN4	up
ENSG00000106483	SFRP4	up
ENSG00000148935	GAS2	up
ENSG00000166153	DEPDC4	up
ENSG00000116977	LGALS8	down
ENSG00000112773	TENT5A	down
ENSG00000174473	GALNTL6	down
ENSG00000154654	NCAM2	down
ENSG00000164142	FAM160A1	down
ENSG00000154153	RETREG1	down
ENSG00000188191	PRKAR1B	down
ENSG00000123700	KCNJ2	down
ENSG00000153291	SLC25A27	down
ENSG00000130822	PNCK	down
ENSG00000115295	CLIP4	down
ENSG00000100473	COCH	down
ENSG00000186523	FAM86B1	down
ENSG00000180730	SHISA2	down
ENSG00000197448	GSTK1	down
ENSG00000182326	C1S	down
ENSG00000112893	MAN2A1	down
ENSG00000187164	SHTN1	down
ENSG00000178695	KCTD12	down
ENSG00000113522	RAD50	down
ENSG00000128482	RNF112	down
ENSG00000139725	RHOF	down
ENSG00000162572	SCNN1D	down
ENSG00000198822	GRM3	down
ENSG00000174514	MFSD4A	down
ENSG00000188629	ZNF177	down
ENSG00000270011	ZNF559-ZNF177	down
ENSG00000164120	HPGD	down
ENSG00000087245	MMP2	down
ENSG00000156453	PCDH1	down
ENSG00000239388	ASB14	down
ENSG00000130193	THEM6	down
ENSG00000133816	MICAL2	down
ENSG00000174348	PODN	down
ENSG00000185615	PDIA2	down
ENSG00000116044	NFE2L2	down
ENSG00000009413	REV3L	down
ENSG00000183690	EFHC2	down
ENSG00000089060	SLC8B1	down
ENSG00000171992	SYNPO	down
ENSG00000250120	PCDHA10	down
ENSG00000136052	SLC41A2	down
ENSG00000100300	TSPO	down
ENSG00000146938	NLGN4X	down
ENSG00000105808	RASA4	down
ENSG00000165588	OTX2	down
ENSG00000198939	ZFP2	down
ENSG00000184922	FMNL1	down
ENSG00000139835	GRTP1	down
ENSG00000176697	BDNF	down
ENSG00000169181	GSG1L	down
ENSG00000165617	DACT1	down
ENSG00000152402	GUCY1A2	down
ENSG00000155254	MARVELD1	down
ENSG00000156504	PABIR2	down
ENSG00000125851	PCSK2	down
ENSG00000065413	ANKRD44	down
ENSG00000170382	LRRN2	down
ENSG00000181085	MAPK15	down
ENSG00000119138	KLF9	down
ENSG00000055813	CCDC85A	down
ENSG00000188687	SLC4A5	down
ENSG00000134508	CABLES1	down
ENSG00000146411	SLC2A12	down
ENSG00000235961	PNMA6A	down
ENSG00000156968	MPV17L	down
ENSG00000107562	CXCL12	down
ENSG00000179909	ZNF154	down
ENSG00000163032	VSNL1	down
ENSG00000076864	RAP1GAP	down
ENSG00000043143	JADE2	down
ENSG00000283378	CNTNAP3C	down
ENSG00000139370	SLC15A4	down
ENSG00000188321	ZNF559	down
ENSG00000162817	C1orf115	down
ENSG00000122861	PLAU	down
ENSG00000130037	KCNA5	down
ENSG00000173040	EVC2	down
ENSG00000137962	ARHGAP29	down
ENSG00000187244	BCAM	down
ENSG00000117154	IGSF21	down
ENSG00000078269	SYNJ2	down
ENSG00000081377	CDC14B	down
ENSG00000154736	ADAMTS5	down
ENSG00000109846	CRYAB	down
ENSG00000182022	CHST15	down
ENSG00000174945	AMZ1	down
ENSG00000171243	SOSTDC1	down
ENSG00000185513	L3MBTL1	down
ENSG00000138166	DUSP5	down
ENSG00000113100	CDH9	down
ENSG00000170214	ADRA1B	down
ENSG00000187416	LHFPL3	down
ENSG00000125637	PSD4	down
ENSG00000162849	KIF26B	down
ENSG00000168038	ULK4	down
ENSG00000128567	PODXL	down
ENSG00000138650	PCDH10	down
ENSG00000101463	SYNDIG1	down
ENSG00000067177	PHKA1	down
ENSG00000205238	SPDYE2	down
ENSG00000185274	GALNT17	down
ENSG00000183778	B3GALT5	down
ENSG00000170381	SEMA3E	down
ENSG00000183715	OPCML	down
ENSG00000173210	ABLIM3	down
ENSG00000198440	ZNF583	down
ENSG00000184923	NUTM2A	down
ENSG00000091039	OSBPL8	down
ENSG00000117480	FAAH	down
ENSG00000171388	APLN	down
ENSG00000169242	EFNA1	down
ENSG00000182771	GRID1	down
ENSG00000111254	AKAP3	down
ENSG00000229544	NKX1-2	down
ENSG00000171724	VAT1L	down
ENSG00000275793	RIMBP3	down
ENSG00000049089	COL9A2	down
ENSG00000090975	PITPNM2	down
ENSG00000204128	C2orf72	down
ENSG00000124140	SLC12A5	down
ENSG00000091513	TF	down
ENSG00000005379	TSPOAP1	down
ENSG00000155265	GOLGA7B	down
ENSG00000129038	LOXL1	down
ENSG00000203499	IQANK1	down
ENSG00000145703	IQGAP2	down
ENSG00000134207	SYT6	down
ENSG00000109163	GNRHR	down
ENSG00000267127	-	down
ENSG00000158286	RNF207	down
ENSG00000197181	PIWIL2	down
ENSG00000163288	GABRB1	down
ENSG00000183421	RIPK4	down
ENSG00000154274	C4orf19	down
ENSG00000215912	TTC34	down
ENSG00000054179	ENTPD2	down
ENSG00000180287	PLD5	down
ENSG00000174292	TNK1	down
ENSG00000089057	SLC23A2	down
ENSG00000104432	IL7	down
ENSG00000166292	TMEM100	down
ENSG00000222014	RAB6C	down
ENSG00000183889	-	down
ENSG00000146858	ZC3HAV1L	down
ENSG00000177990	DPY19L2	down
ENSG00000142449	FBN3	down
ENSG00000006047	YBX2	down
ENSG00000197705	KLHL14	down
ENSG00000162390	ACOT11	down
ENSG00000154229	PRKCA	down
ENSG00000164542	KIAA0895	down
ENSG00000067842	ATP2B3	down
ENSG00000158816	VWA5B1	down
ENSG00000145390	USP53	down
ENSG00000188158	NHS	down
ENSG00000168348	INSM2	down
ENSG00000104267	CA2	down
ENSG00000166450	PRTG	down
ENSG00000213658	LAT	down
ENSG00000173227	SYT12	down
ENSG00000162946	DISC1	down
ENSG00000136011	STAB2	down
ENSG00000122733	PHF24	down
ENSG00000104332	SFRP1	down
ENSG00000099260	PALMD	down
ENSG00000215788	TNFRSF25	down
ENSG00000088387	DOCK9	down
ENSG00000158806	NPM2	down
ENSG00000162975	KCNF1	down
ENSG00000164796	CSMD3	down
ENSG00000187554	TLR5	down
ENSG00000157227	MMP14	down
ENSG00000198223	CSF2RA	down
ENSG00000107560	RAB11FIP2	down
ENSG00000137449	CPEB2	down
ENSG00000188130	MAPK12	down
ENSG00000072954	TMEM38A	down
ENSG00000122674	CCZ1	down
ENSG00000189108	IL1RAPL2	down
ENSG00000166340	TPP1	down
ENSG00000119042	SATB2	down
ENSG00000196873	CBWD3	down
ENSG00000164128	NPY1R	down
ENSG00000196653	ZNF502	down
ENSG00000198743	SLC5A3	down
ENSG00000141905	NFIC	down
ENSG00000158234	FAIM	down
ENSG00000132975	GPR12	down
ENSG00000166479	TMX3	down
ENSG00000136478	TEX2	down
ENSG00000104205	SGK3	down
ENSG00000105329	TGFB1	down
ENSG00000004799	PDK4	down
ENSG00000186297	GABRA5	down
ENSG00000129116	PALLD	down
ENSG00000006210	CX3CL1	down
ENSG00000009950	MLXIPL	down
ENSG00000187664	HAPLN4	down
ENSG00000197375	SLC22A5	down
ENSG00000132932	ATP8A2	down
ENSG00000101695	RNF125	down
ENSG00000150672	DLG2	down
ENSG00000177469	CAVIN1	down
ENSG00000228696	ARL17B	down
ENSG00000175874	CREG2	down
ENSG00000159239	-	down
ENSG00000116663	FBXO6	down
ENSG00000152969	JAKMIP1	down
ENSG00000006534	ALDH3B1	down
ENSG00000038295	TLL1	down
ENSG00000153789	CIBAR2	down
ENSG00000185480	PARPBP	down
ENSG00000184719	RNLS	down
ENSG00000138738	PRDM5	down
ENSG00000183682	BMP8A	down
ENSG00000275993	SIK1B	down
ENSG00000234965	SHISA8	down
ENSG00000149575	SCN2B	down
ENSG00000122642	FKBP9	down
ENSG00000180245	RRH	down
ENSG00000144596	GRIP2	down
ENSG00000139985	ADAM21	down
ENSG00000213983	AP1G2	down
ENSG00000110328	GALNT18	down
ENSG00000107242	PIP5K1B	down
ENSG00000103044	HAS3	down
ENSG00000143127	ITGA10	down
ENSG00000144583	MARCHF4	down
ENSG00000137819	PAQR5	down
ENSG00000185055	EFCAB10	down
ENSG00000206127	GOLGA8O	down
ENSG00000152078	TLCD4	down
ENSG00000185201	IFITM2	down
ENSG00000102466	FGF14	down
ENSG00000150051	MKX	down
ENSG00000117425	PTCH2	down
ENSG00000116329	OPRD1	down
ENSG00000155629	PIK3AP1	down
ENSG00000180113	TDRD6	down
ENSG00000188730	VWC2	down
ENSG00000162825	NBPF20	down
ENSG00000136943	CTSV	down
ENSG00000042781	USH2A	down
ENSG00000070182	SPTB	down
ENSG00000164023	SGMS2	down
ENSG00000125845	BMP2	down
ENSG00000159915	ZNF233	down
ENSG00000131095	GFAP	down
ENSG00000103335	PIEZO1	down
ENSG00000145779	TNFAIP8	down
ENSG00000112419	PHACTR2	down
ENSG00000106546	AHR	down
ENSG00000136531	SCN2A	down
ENSG00000138311	ZNF365	down
ENSG00000147256	ARHGAP36	down
ENSG00000136928	GABBR2	down
ENSG00000175806	MSRA	down
ENSG00000158560	DYNC1I1	down
ENSG00000152779	SLC16A12	down
ENSG00000285162	-	down
ENSG00000113327	GABRG2	down
ENSG00000213694	S1PR3	down
ENSG00000170049	KCNAB3	down
ENSG00000183032	SLC25A21	down
ENSG00000285777	-	down
ENSG00000137880	GCHFR	down
ENSG00000134627	PIWIL4	down
ENSG00000203727	SAMD5	down
ENSG00000186567	CEACAM19	down
ENSG00000189143	CLDN4	down
ENSG00000152785	BMP3	down
ENSG00000122359	ANXA11	down
ENSG00000121454	LHX4	down
ENSG00000166922	SCG5	down
ENSG00000081059	TCF7	down
ENSG00000153347	FAM81B	down
ENSG00000157542	KCNJ6	down
ENSG00000180828	BHLHE22	down
ENSG00000213965	NUDT19	down
ENSG00000127152	BCL11B	down
ENSG00000147459	DOCK5	down
ENSG00000101144	BMP7	down
ENSG00000238083	LRRC37A2	down
ENSG00000136297	MMD2	down
ENSG00000168952	STXBP6	down
ENSG00000157214	STEAP2	down
ENSG00000041353	RAB27B	down
ENSG00000143375	CGN	down
ENSG00000184313	MROH7	down
ENSG00000176381	PRR18	down
ENSG00000165996	HACD1	down
ENSG00000135437	RDH5	down
ENSG00000127249	ATP13A4	down
ENSG00000106004	HOXA5	down
ENSG00000089169	RPH3A	down
ENSG00000197461	PDGFA	down
ENSG00000197816	CCDC180	down
ENSG00000166387	PPFIBP2	down
ENSG00000196990	FAM163B	down
ENSG00000135577	NMBR	down
ENSG00000155886	SLC24A2	down
ENSG00000204335	SP5	down
ENSG00000122420	PTGFR	down
ENSG00000150995	ITPR1	down
ENSG00000173597	SULT1B1	down
ENSG00000185829	ARL17A	down
ENSG00000140398	NEIL1	down
ENSG00000173890	GPR160	down
ENSG00000128564	VGF	down
ENSG00000140839	CLEC18B	down
ENSG00000165995	CACNB2	down
ENSG00000184113	CLDN5	down
ENSG00000241404	EGFL8	down
ENSG00000081923	ATP8B1	down
ENSG00000285713	-	down
ENSG00000074660	SCARF1	down
ENSG00000184792	OSBP2	down
ENSG00000122547	EEPD1	down
ENSG00000102007	PLP2	down
ENSG00000168032	ENTPD3	down
ENSG00000177483	RBM44	down
ENSG00000173991	TCAP	down
ENSG00000145451	GLRA3	down
ENSG00000168702	LRP1B	down
ENSG00000148426	PROSER2	down
ENSG00000145198	VWA5B2	down
ENSG00000118407	FILIP1	down
ENSG00000156510	HKDC1	down
ENSG00000087253	LPCAT2	down
ENSG00000185760	KCNQ5	down
ENSG00000182575	NXPH3	down
ENSG00000153721	CNKSR3	down
ENSG00000169255	B3GALNT1	down
ENSG00000188707	ZBED6CL	down
ENSG00000185869	ZNF829	down
ENSG00000131044	TTLL9	down
ENSG00000204969	PCDHA2	down
ENSG00000011677	GABRA3	down
ENSG00000106089	STX1A	down
ENSG00000138074	SLC5A6	down
ENSG00000253598	SLC10A5	down
ENSG00000183783	KCTD8	down
ENSG00000253731	PCDHGA6	down
ENSG00000082512	TRAF5	down
ENSG00000092377	TBL1Y	down
ENSG00000185052	SLC24A3	down
ENSG00000196116	TDRD7	down
ENSG00000154975	CA10	down
ENSG00000118513	MYB	down
ENSG00000164588	HCN1	down
ENSG00000115155	OTOF	down
ENSG00000254221	PCDHGB1	down
ENSG00000157388	CACNA1D	down
ENSG00000188223	-	down
ENSG00000163762	TM4SF18	down
ENSG00000132481	TRIM47	down
ENSG00000155962	CLIC2	down
ENSG00000164619	BMPER	down
ENSG00000166546	BEAN1	down
ENSG00000072315	TRPC5	down
ENSG00000119147	ECRG4	down
ENSG00000130829	DUSP9	down
ENSG00000140090	SLC24A4	down
ENSG00000112164	GLP1R	down
ENSG00000267041	ZNF850	down
ENSG00000172817	CYP7B1	down
ENSG00000121310	ECHDC2	down
ENSG00000106366	SERPINE1	down
ENSG00000166342	NETO1	down
ENSG00000163013	FBXO41	down
ENSG00000197584	KCNMB2	down
ENSG00000179598	PLD6	down
ENSG00000104140	RHOV	down
ENSG00000156564	LRFN2	down
ENSG00000230778	ANKRD63	down
ENSG00000128655	PDE11A	down
ENSG00000188176	SMTNL2	down
ENSG00000288591	-	down
ENSG00000074211	PPP2R2C	down
ENSG00000083814	ZNF671	down
ENSG00000087303	NID2	down
ENSG00000166105	GLB1L3	down
ENSG00000133019	CHRM3	down
ENSG00000146374	RSPO3	down
ENSG00000179542	SLITRK4	down
ENSG00000107159	CA9	down
ENSG00000144645	OSBPL10	down
ENSG00000130635	COL5A1	down
ENSG00000116183	PAPPA2	down
ENSG00000174948	GPR149	down
ENSG00000197121	PGAP1	down
ENSG00000131477	RAMP2	down
ENSG00000245848	CEBPA	down
ENSG00000138379	MSTN	down
ENSG00000016391	CHDH	down
ENSG00000111077	TNS2	down
ENSG00000119946	CNNM1	down
ENSG00000168481	LGI3	down
ENSG00000107317	PTGDS	down
ENSG00000211448	DIO2	down
ENSG00000085514	PILRA	down
ENSG00000145908	ZNF300	down
ENSG00000111262	KCNA1	down
ENSG00000145217	SLC26A1	down
ENSG00000162614	NEXN	down
ENSG00000082482	KCNK2	down
ENSG00000119630	PGF	down
ENSG00000120549	KIAA1217	down
ENSG00000137252	HCRTR2	down
ENSG00000146054	TRIM7	down
ENSG00000178394	HTR1A	down
ENSG00000104998	IL27RA	down
ENSG00000140284	SLC27A2	down
ENSG00000127324	TSPAN8	down
ENSG00000086205	FOLH1	down
ENSG00000167555	ZNF528	down
ENSG00000121904	CSMD2	down
ENSG00000115041	KCNIP3	down
ENSG00000110324	IL10RA	down
ENSG00000178826	TMEM139	down
ENSG00000188039	NWD1	down
ENSG00000120738	EGR1	down
ENSG00000280670	CCDC163	down
ENSG00000257743	MGAM2	down
ENSG00000183111	ARHGEF37	down
ENSG00000135926	TMBIM1	down
ENSG00000151025	GPR158	down
ENSG00000127824	TUBA4A	down
ENSG00000111801	BTN3A3	down
ENSG00000108932	SLC16A6	down
ENSG00000110675	ELMOD1	down
ENSG00000080503	SMARCA2	down
ENSG00000174453	VWC2L	down
ENSG00000196932	TMEM26	down
ENSG00000196136	SERPINA3	down
ENSG00000186710	CFAP73	down
ENSG00000117525	F3	down
ENSG00000184307	ZDHHC23	down
ENSG00000147655	RSPO2	down
ENSG00000174125	TLR1	down
ENSG00000109689	STIM2	down
ENSG00000225614	ZNF469	down
ENSG00000109738	GLRB	down
ENSG00000169499	PLEKHA2	down
ENSG00000169933	FRMPD4	down
ENSG00000183773	AIFM3	down
ENSG00000168356	SCN11A	down
ENSG00000138678	GPAT3	down
ENSG00000162981	LRATD1	down
ENSG00000163251	FZD5	down
ENSG00000198597	ZNF536	down
ENSG00000180815	MAP3K15	down
ENSG00000182256	GABRG3	down
ENSG00000178773	CPNE7	down
ENSG00000050628	PTGER3	down
ENSG00000162878	PKDCC	down
ENSG00000117600	PLPPR4	down
ENSG00000205730	ITPRIPL2	down
ENSG00000163235	TGFA	down
ENSG00000147588	PMP2	down
ENSG00000166840	GLYATL1	down
ENSG00000165186	PTCHD1	down
ENSG00000176293	ZNF135	down
ENSG00000152910	CNTNAP4	down
ENSG00000185352	HS6ST3	down
ENSG00000163638	ADAMTS9	down
ENSG00000002587	HS3ST1	down
ENSG00000168081	PNOC	down
ENSG00000180535	BHLHA15	down
ENSG00000197971	MBP	down
ENSG00000133116	KL	down
ENSG00000100376	FAM118A	down
ENSG00000232653	GOLGA8N	down
ENSG00000166002	SMCO4	down
ENSG00000189409	MMP23B	down
ENSG00000101977	MCF2	down
ENSG00000174417	TRHR	down
ENSG00000196277	GRM7	down
ENSG00000151623	NR3C2	down
ENSG00000167549	CORO6	down
ENSG00000139973	SYT16	down
ENSG00000115232	ITGA4	down
ENSG00000136002	ARHGEF4	down
ENSG00000182348	ZNF804B	down
ENSG00000140022	STON2	down
ENSG00000178201	VN1R1	down
ENSG00000008128	CDK11A	down
ENSG00000138741	TRPC3	down
ENSG00000248905	FMN1	down
ENSG00000175426	PCSK1	down
ENSG00000188386	PPP3R2	down
ENSG00000116254	CHD5	down
ENSG00000260220	CCDC187	down
ENSG00000173705	SUSD5	down
ENSG00000132386	SERPINF1	down
ENSG00000144893	MED12L	down
ENSG00000166321	NUDT13	down
ENSG00000171227	TMEM37	down
ENSG00000162068	NTN3	down
ENSG00000131196	NFATC1	down
ENSG00000009694	TENM1	down
ENSG00000203877	RIPPLY2	down
ENSG00000123094	RASSF8	down
ENSG00000242715	CCDC169	down
ENSG00000153820	SPHKAP	down
ENSG00000282872	C1orf232	down
ENSG00000113211	PCDHB6	down
ENSG00000095303	PTGS1	down
ENSG00000172197	MBOAT1	down
ENSG00000168309	FAM107A	down
ENSG00000178965	ERICH3	down
ENSG00000288611	NPBWR1	down
ENSG00000124067	SLC12A4	down
ENSG00000155846	PPARGC1B	down
ENSG00000072657	TRHDE	down
ENSG00000154930	ACSS1	down
ENSG00000074416	MGLL	down
ENSG00000157445	CACNA2D3	down
ENSG00000124772	CPNE5	down
ENSG00000140015	KCNH5	down
ENSG00000156486	KCNS2	down
ENSG00000008513	ST3GAL1	down
ENSG00000091428	RAPGEF4	down
ENSG00000185272	RBM11	down
ENSG00000102287	GABRE	down
ENSG00000166006	KCNC2	down
ENSG00000213398	LCAT	down
ENSG00000115363	EVA1A	down
ENSG00000101974	ATP11C	down
ENSG00000013297	CLDN11	down
ENSG00000121281	ADCY7	down
ENSG00000079337	RAPGEF3	down
ENSG00000157219	HTR5A	down
ENSG00000183837	PNMA3	down
ENSG00000127084	FGD3	down
ENSG00000233932	CTXN2	down
ENSG00000100234	TIMP3	down
ENSG00000124749	COL21A1	down
ENSG00000206077	ZDHHC11B	down
ENSG00000049192	ADAMTS6	down
ENSG00000136267	DGKB	down
ENSG00000172638	EFEMP2	down
ENSG00000198774	RASSF9	down
ENSG00000149305	HTR3B	down
ENSG00000042493	CAPG	down
ENSG00000134864	GGACT	down
ENSG00000103528	SYT17	down
ENSG00000170074	FAM153A	down
ENSG00000197859	ADAMTSL2	down
ENSG00000169618	PROKR1	down
ENSG00000236279	CLEC2L	down
ENSG00000003436	TFPI	down
ENSG00000069702	TGFBR3	down
ENSG00000085563	ABCB1	down
ENSG00000144355	DLX1	down
ENSG00000140937	CDH11	down
ENSG00000007264	MATK	down
ENSG00000162804	SNED1	down
ENSG00000171864	PRND	down
ENSG00000070159	PTPN3	down
ENSG00000198121	LPAR1	down
ENSG00000170485	NPAS2	down
ENSG00000164690	SHH	down
ENSG00000156076	WIF1	down
ENSG00000187098	MITF	down
ENSG00000065320	NTN1	down
ENSG00000175318	GRAMD2A	down
ENSG00000198785	GRIN3A	down
ENSG00000139263	LRIG3	down
ENSG00000182240	BACE2	down
ENSG00000093010	COMT	down
ENSG00000160282	FTCD	down
ENSG00000136698	CFC1	down
ENSG00000089116	LHX5	down
ENSG00000018869	ZNF582	down
ENSG00000104361	NIPAL2	down
ENSG00000161249	DMKN	down
ENSG00000128510	CPA4	down
ENSG00000081853	PCDHGA2	down
ENSG00000146122	DAAM2	down
ENSG00000118276	B4GALT6	down
ENSG00000109158	GABRA4	down
ENSG00000183484	GPR132	down
ENSG00000126822	PLEKHG3	down
ENSG00000164651	SP8	down
ENSG00000171804	WDR87	down
ENSG00000133124	IRS4	down
ENSG00000074706	IPCEF1	down
ENSG00000181072	CHRM2	down
ENSG00000065717	TLE2	down
ENSG00000165215	CLDN3	down
ENSG00000125965	GDF5	down
ENSG00000205923	CEMP1	down
ENSG00000204956	PCDHGA1	down
ENSG00000173156	RHOD	down
ENSG00000283486	FAM95C	down
ENSG00000143674	MAP3K21	down
ENSG00000122025	FLT3	down
ENSG00000110723	EXPH5	down
ENSG00000160221	GATD3A	down
ENSG00000164181	ELOVL7	down
ENSG00000150275	PCDH15	down
ENSG00000182255	KCNA4	down
ENSG00000039068	CDH1	down
ENSG00000145864	GABRB2	down
ENSG00000084636	COL16A1	down
ENSG00000133121	STARD13	down
ENSG00000140403	DNAJA4	down
ENSG00000101443	WFDC2	down
ENSG00000196639	HRH1	down
ENSG00000163046	ANKRD30BL	down
ENSG00000183486	MX2	down
ENSG00000188549	CCDC9B	down
ENSG00000198838	RYR3	down
ENSG00000134198	TSPAN2	down
ENSG00000273079	GRIN2B	down
ENSG00000183166	CALN1	down
ENSG00000186377	CYP4X1	down
ENSG00000170412	GPRC5C	down
ENSG00000137843	PAK6	down
ENSG00000185652	NTF3	down
ENSG00000235718	MFRP	down
ENSG00000152527	PLEKHH2	down
ENSG00000152669	CCNO	down
ENSG00000177283	FZD8	down
ENSG00000278195	SSTR3	down
ENSG00000113494	PRLR	down
ENSG00000180543	TSPYL5	down
ENSG00000108684	ASIC2	down
ENSG00000144810	COL8A1	down
ENSG00000164418	GRIK2	down
ENSG00000166289	PLEKHF1	down
ENSG00000163513	TGFBR2	down
ENSG00000145824	CXCL14	down
ENSG00000183654	MARCHF11	down
ENSG00000177098	SCN4B	down
ENSG00000155749	FLACC1	down
ENSG00000107984	DKK1	down
ENSG00000019991	HGF	down
ENSG00000203805	PLPP4	down
ENSG00000151090	THRB	down
ENSG00000039319	ZFYVE16	down
ENSG00000100197	CYP2D6	down
ENSG00000170624	SGCD	down
ENSG00000108924	HLF	down
ENSG00000129667	RHBDF2	down
ENSG00000173110	HSPA6	down
ENSG00000198734	F5	down
ENSG00000144290	SLC4A10	down
ENSG00000142611	PRDM16	down
ENSG00000133401	PDZD2	down
ENSG00000166979	EVA1C	down
ENSG00000036448	MYOM2	down
ENSG00000184470	TXNRD2	down
ENSG00000285476	-	down
ENSG00000165171	METTL27	down
ENSG00000145431	PDGFC	down
ENSG00000171551	ECEL1	down
ENSG00000162722	TRIM58	down
ENSG00000204516	MICB	down
ENSG00000198879	SFMBT2	down
ENSG00000183036	PCP4	down
ENSG00000188011	RTP5	down
ENSG00000150907	FOXO1	down
ENSG00000136546	SCN7A	down
ENSG00000198010	DLGAP2	down
ENSG00000168959	GRM5	down
ENSG00000212916	MAP10	down
ENSG00000163131	CTSS	down
ENSG00000110195	FOLR1	down
ENSG00000277399	GPR179	down
ENSG00000198691	ABCA4	down
ENSG00000173376	NDNF	down
ENSG00000188981	MSANTD1	down
ENSG00000103534	TMC5	down
ENSG00000163673	DCLK3	down
ENSG00000185436	IFNLR1	down
ENSG00000148680	HTR7	down
ENSG00000163492	CCDC141	down
ENSG00000108950	FAM20A	down
ENSG00000183090	FREM3	down
ENSG00000165521	EML5	down
ENSG00000164136	IL15	down
ENSG00000198673	TAFA2	down
ENSG00000133067	LGR6	down
ENSG00000151062	CACNA2D4	down
ENSG00000091622	PITPNM3	down
ENSG00000170542	SERPINB9	down
ENSG00000174370	C11orf45	down
ENSG00000112309	B3GAT2	down
ENSG00000006747	SCIN	down
ENSG00000187094	CCK	down
ENSG00000054803	CBLN4	down
ENSG00000262209	PCDHGB3	down
ENSG00000196867	ZFP28	down
ENSG00000107738	VSIR	down
ENSG00000271447	MMP28	down
ENSG00000048052	HDAC9	down
ENSG00000173559	NABP1	down
ENSG00000053438	NNAT	down
ENSG00000008441	NFIX	down
ENSG00000215475	SIAH3	down
ENSG00000183876	ARSI	down
ENSG00000166960	CCDC178	down
ENSG00000152518	ZFP36L2	down
ENSG00000198633	ZNF534	down
ENSG00000198915	RASGEF1A	down
ENSG00000196071	OR2L13	down
ENSG00000083067	TRPM3	down
ENSG00000060140	STYK1	down
ENSG00000197385	ZNF860	down
ENSG00000198883	PNMA5	down
ENSG00000204779	FOXD4L5	down
ENSG00000154655	L3MBTL4	down
ENSG00000163694	RBM47	down
ENSG00000104369	JPH1	down
ENSG00000187210	GCNT1	down
ENSG00000155093	PTPRN2	down
ENSG00000179520	SLC17A8	down
ENSG00000157087	ATP2B2	down
ENSG00000278318	ZNF229	down
ENSG00000185985	SLITRK2	down
ENSG00000164512	ANKRD55	down
ENSG00000182600	SNORC	down
ENSG00000135063	FAM189A2	down
ENSG00000147481	SNTG1	down
ENSG00000140481	CCDC33	down
ENSG00000184659	FOXD4L4	down
ENSG00000104611	SH2D4A	down
ENSG00000146090	RASGEF1C	down
ENSG00000157150	TIMP4	down
ENSG00000181215	C4orf50	down
ENSG00000164300	SERINC5	down
ENSG00000092068	SLC7A8	down
ENSG00000183117	CSMD1	down
ENSG00000154478	GPR26	down
ENSG00000130768	SMPDL3B	down
ENSG00000165553	NGB	down
ENSG00000135604	STX11	down
ENSG00000132164	SLC6A11	down
ENSG00000147041	SYTL5	down
ENSG00000197506	SLC28A3	down
ENSG00000109854	HTATIP2	down
ENSG00000175879	HOXD8	down
ENSG00000205835	GMNC	down
ENSG00000142686	C1orf216	down
ENSG00000159216	RUNX1	down
ENSG00000157005	SST	down
ENSG00000187889	FYB2	down
ENSG00000160471	COX6B2	down
ENSG00000082438	COBLL1	down
ENSG00000089250	NOS1	down
ENSG00000022355	GABRA1	down
ENSG00000175287	PHYHD1	down
ENSG00000214688	C10orf105	down
ENSG00000163394	CCKAR	down
ENSG00000134853	PDGFRA	down
ENSG00000136931	NR5A1	down
ENSG00000072858	SIDT1	down
ENSG00000160886	LY6K	down
ENSG00000127129	EDN2	down
ENSG00000172349	IL16	down
ENSG00000099715	PCDH11Y	down
ENSG00000287694	-	down
ENSG00000095585	BLNK	down
ENSG00000132329	RAMP1	down
ENSG00000187944	C2orf66	down
ENSG00000216490	IFI30	down
ENSG00000124249	KCNK15	down
ENSG00000107147	KCNT1	down
ENSG00000105976	MET	down
ENSG00000115290	GRB14	down
ENSG00000136883	KIF12	down
ENSG00000152467	ZSCAN1	down
ENSG00000141738	GRB7	down
ENSG00000164112	SMIM43	down
ENSG00000113209	PCDHB5	down
ENSG00000166510	CCDC68	down
ENSG00000128805	ARHGAP22	down
ENSG00000150687	PRSS23	down
ENSG00000111344	RASAL1	down
ENSG00000102290	PCDH11X	down
ENSG00000121297	TSHZ3	down
ENSG00000234602	MCIDAS	down
ENSG00000138449	SLC40A1	down
ENSG00000058335	RASGRF1	down
ENSG00000177459	ERICH5	down
ENSG00000110660	SLC35F2	down
ENSG00000099866	MADCAM1	down
ENSG00000111012	CYP27B1	down
ENSG00000145194	ECE2	down
ENSG00000182489	XKRX	down
ENSG00000196660	SLC30A10	down
ENSG00000159450	TCHH	down
ENSG00000170561	IRX2	down
ENSG00000183379	SYNDIG1L	down
ENSG00000112394	SLC16A10	down
ENSG00000121905	HPCA	down
ENSG00000147255	IGSF1	down
ENSG00000179023	KLHDC7A	down
ENSG00000186732	MPPED1	down
ENSG00000125257	ABCC4	down
ENSG00000256029	-	down
ENSG00000158050	DUSP2	down
ENSG00000165478	HEPACAM	down
ENSG00000164483	SAMD3	down
ENSG00000136541	ERMN	down
ENSG00000254087	LYN	down
ENSG00000183423	LRIT3	down
ENSG00000185070	FLRT2	down
ENSG00000150594	ADRA2A	down
ENSG00000196975	ANXA4	down
ENSG00000184160	ADRA2C	down
ENSG00000073350	LLGL2	down
ENSG00000159403	C1R	down
ENSG00000143226	FCGR2A	down
ENSG00000120457	KCNJ5	down
ENSG00000167711	SERPINF2	down
ENSG00000163453	IGFBP7	down
ENSG00000144119	C1QL2	down
ENSG00000276547	PCDHGB5	down
ENSG00000162571	TTLL10	down
ENSG00000142698	C1orf94	down
ENSG00000075290	WNT8B	down
ENSG00000115474	KCNJ13	down
ENSG00000164129	NPY5R	down
ENSG00000116096	SPR	down
ENSG00000078900	TP73	down
ENSG00000134438	RAX	down
ENSG00000183508	TENT5C	down
ENSG00000154734	ADAMTS1	down
ENSG00000159212	CLIC6	down
ENSG00000113749	HRH2	down
ENSG00000053918	KCNQ1	down
ENSG00000137868	STRA6	down
ENSG00000196562	SULF2	down
ENSG00000052344	PRSS8	down
ENSG00000062282	DGAT2	down
ENSG00000239697	TNFSF12	down
ENSG00000258405	ZNF578	down
ENSG00000137727	ARHGAP20	down
ENSG00000172716	SLFN11	down
ENSG00000137841	PLCB2	down
ENSG00000081842	PCDHA6	down
ENSG00000187627	RGPD1	down
ENSG00000170801	HTRA3	down
ENSG00000267368	UPK3BL1	down
ENSG00000104899	AMH	down
ENSG00000259417	CTXND1	down
ENSG00000170439	METTL7B	down
ENSG00000164251	F2RL1	down
ENSG00000165124	SVEP1	down
ENSG00000123612	ACVR1C	down
ENSG00000138207	RBP4	down
ENSG00000128849	CGNL1	down
ENSG00000099960	SLC7A4	down
ENSG00000138083	SIX3	down
ENSG00000166159	LRTM2	down
ENSG00000197635	DPP4	down
ENSG00000167178	ISLR2	down
ENSG00000271271	UGT2A2	down
ENSG00000116147	TNR	down
ENSG00000128052	KDR	down
ENSG00000135547	HEY2	down
ENSG00000154175	ABI3BP	down
ENSG00000007174	DNAH9	down
ENSG00000123901	GPR83	down
ENSG00000196263	ZNF471	down
ENSG00000165376	CLDN2	down
ENSG00000198944	SOWAHA	down
ENSG00000113389	NPR3	down
ENSG00000163817	SLC6A20	down
ENSG00000134668	SPOCD1	down
ENSG00000155926	SLA	down
ENSG00000173714	WFIKKN2	down
ENSG00000136542	GALNT5	down
ENSG00000183439	TRIM61	down
ENSG00000114812	VIPR1	down
ENSG00000132692	BCAN	down
ENSG00000133863	TEX15	down
ENSG00000138115	CYP2C8	down
ENSG00000117228	GBP1	down
ENSG00000241945	PWP2	down
ENSG00000117595	IRF6	down
ENSG00000164007	CLDN19	down
ENSG00000126861	OMG	down
ENSG00000119283	TRIM67	down
ENSG00000163285	GABRG1	down
ENSG00000118004	COLEC11	down
ENSG00000007237	GAS7	down
ENSG00000011083	SLC6A7	down
ENSG00000224712	NPIPA3	down
ENSG00000178343	SHISA3	down
ENSG00000189420	ZFP92	down
ENSG00000137090	DMRT1	down
ENSG00000196611	MMP1	down
ENSG00000116016	EPAS1	down
ENSG00000147606	SLC26A7	down
ENSG00000182118	FAM89A	down
ENSG00000107807	TLX1	down
ENSG00000173253	DMRT2	down
ENSG00000059377	TBXAS1	down
ENSG00000137573	SULF1	down
ENSG00000019186	CYP24A1	down
ENSG00000240583	AQP1	down
ENSG00000253485	PCDHGA5	down
ENSG00000121075	TBX4	down
ENSG00000173467	AGR3	down
ENSG00000102024	PLS3	down
ENSG00000160352	ZNF714	down
ENSG00000182601	HS3ST4	down
ENSG00000169836	TACR3	down
ENSG00000047457	CP	down
ENSG00000184860	SDR42E1	down
ENSG00000176399	DMRTA1	down
ENSG00000170549	IRX1	down
ENSG00000004848	ARX	down
ENSG00000165905	LARGE2	down
ENSG00000198046	ZNF667	down
ENSG00000187048	CYP4A11	down
ENSG00000065675	PRKCQ	down
ENSG00000102239	BRS3	down
ENSG00000171476	HOPX	down
ENSG00000150540	HNMT	down
ENSG00000187690	EZHIP	down
ENSG00000124731	TREM1	down
ENSG00000168743	NPNT	down
ENSG00000174808	BTC	down
ENSG00000145358	DDIT4L	down
ENSG00000111700	SLCO1B3	down
ENSG00000140470	ADAMTS17	down
ENSG00000104518	GSDMD	down
ENSG00000016082	ISL1	down
ENSG00000135373	EHF	down
ENSG00000196581	AJAP1	down
ENSG00000188133	TMEM215	down
ENSG00000121898	CPXM2	down
ENSG00000004948	CALCR	down
ENSG00000011465	DCN	down
ENSG00000231213	PLSCR5	down
ENSG00000064195	DLX3	down
ENSG00000091136	LAMB1	down
ENSG00000188372	ZP3	down
ENSG00000087494	PTHLH	down
ENSG00000064218	DMRT3	down
ENSG00000183873	SCN5A	down
ENSG00000118271	TTR	down
ENSG00000203737	GPR52	down
ENSG00000110455	ACCS	down
ENSG00000172782	FADS6	down
ENSG00000147724	FAM135B	down
ENSG00000151882	CCL28	down
ENSG00000183206	POTEC	down
ENSG00000017427	IGF1	down
ENSG00000185304	RGPD2	down
ENSG00000142700	DMRTA2	down
ENSG00000120057	SFRP5	down
ENSG00000213967	ZNF726	down
ENSG00000147246	HTR2C	down
ENSG00000170370	EMX2	down
ENSG00000153266	FEZF2	down
ENSG00000198028	ZNF560	down
ENSG00000125813	PAX1	down
ENSG00000143631	FLG	down
ENSG00000187783	TMEM72	down
ENSG00000127903	ZNF835	down
ENSG00000180777	ANKRD30B	down
ENSG00000176769	TCERG1L	down
ENSG00000166573	GALR1	down
ENSG00000173610	UGT2A1	down
ENSG00000213171	LINGO4	down
ENSG00000159398	CES5A	down
ENSG00000136535	TBR1	down
ENSG00000162542	TMCO4	down
ENSG00000269699	ZIM2	down
ENSG00000166569	CPLX4	down
ENSG00000183395	PMCH	down
ENSG00000164299	SPZ1	down
ENSG00000094755	GABRP	down
ENSG00000109193	SULT1E1	down
ENSG00000204936	CD177	down
ENSG00000166670	MMP10	down
ENSG00000149452	SLC22A8	down
ENSG00000196109	ZNF676	down
ENSG00000123496	IL13RA2	down
ENSG00000007216	SLC13A2	down
ENSG00000173762	CD7	down
ENSG00000022556	NLRP2	down
ENSG00000254245	PCDHGA3	down
ENSG00000188803	SHISA6	down
ENSG00000269067	ZNF728	down
ENSG00000197134	ZNF257	down
ENSG00000130226	DPP6	down
ENSG00000168333	PPDPFL	down
ENSG00000219438	TAFA5	down
ENSG00000012817	KDM5D	down
ENSG00000160321	ZNF208	down
ENSG00000268738	HSFX2	down
ENSG00000198300	PEG3	down
ENSG00000181234	TMEM132C	down
ENSG00000196090	PTPRT	down
ENSG00000198692	EIF1AY	down
