# Supplementary material for: A human forebrain organoid model reveals the essential function of GTF2IRD1-TTR-ERK axis for the neurodevelopmental deficits of Williams syndrome
Source: eLife. 2024 Dec 13;13:RP98081. doi: 10.7554/eLife.98081 (PMC11643624; doi:10.7554/eLife.98081)
Supplement: Supplementary file 2. [file elife-98081-supp2.xlsx]

## Sheet: Sheet1
REAGENT or RESOURCE	SOURCE	IDENTIFIER
Antibodies
Rabbit monoclonal anti-Nanog	Cell Signaling Technology	Cat#4903
Mouse monoclonal anti-TRA-1-60	Abcam	Cat#ab16288
Mouse monoclonal anti-SSEA4	Abcam	Cat#ab16287
Rabbit polyclonal anti-Oct4	Abcam	Cat#ab19857
Rabbit monoclonal anti-SOX2	Abcam	Cat#ab92494
Goat anti-human SOX2	R&D systems	Cat#BAF2018
Rat monoclonal anti-Ctip2	Abcam	Cat#ab18465
Mouse monoclonal anti-Ki67	BD Biosciences	Cat#550609
Rabbit monoclonal anti-Doublecortin (DCX)	Cell Signaling Technology	Cat#4604
Rabbit polyclonal anti-TBR1	Abcam	Cat#ab31940
Rabbit polyclonal anti-TBR2	Abcam	Cat#ab23345
Chicken Polyclonal anti-MAP2	Novus Biologicals	Cat#NB300-213
Rabbit monoclonal anti-PSD95	Cell Signaling Technology	Cat#3450
Mouse monoclonal anti-vGluT1	Millipore	Cat#MAB5502
Rabbit monoclonal anti-SATB2	Abcam	Cat#ab92446
Rabbit monoclonal anti-TTR/Prealbumin	BIOSS Antibodies	Cat#bs-0152R
Rabbit polyclonal anti-GTF2IRD1	Novus Biologicals	Cat#NBP1-91973
Mouse monoclonal anti-βIII Tubulin (Tuj1)	Promega	Cat#G712A
Mouse monoclonal anti-Camk2α	Cell Signaling Technology	Cat#50049
Mouse monoclonal anti-GABA	Sigma	Cat#A2052
AlexaFluor488 goat anti-mouse	Thermo Fisher Scientific	Cat# A11001
AlexaFluor488 goat anti-rabbit	Thermo Fisher Scientific	Cat# A11008
AlexaFluor568 goat anti-mouse	Thermo Fisher Scientific	Cat# A11004
AlexaFluor568 goat anti-rabbit	Thermo Fisher Scientific	Cat# A11036
AlexaFluor568 goat anti-rat	Thermo Fisher Scientific	Cat# A11077
AlexaFluor647 goat anti-rat	Thermo Fisher Scientific	Cat# A21247
AlexaFluor488 donkey anti-mouse	Thermo Fisher Scientific	Cat# A21202
AlexaFluor488 donkey anti-rabbit	Thermo Fisher Scientific	Cat# A21206
AlexaFluor568 donkey anti-goat	Thermo Fisher Scientific	Cat# A11057
AlexaFluor647 goat anti-chicken	Thermo Fisher Scientific	Cat# A21449
Chemicals, peptides, and recombinant proteins
Matrigel Matrix	corning	Cat#354230
Knock Out™ SR	gibco	Cat#10828-028
B-27 Supplement (50X)	gibco	Cat#17504-044
N-2 supplement (100X)	gibco	Cat#17502-048
MEM NEAA (100X)	gibco	Cat#11140-050
GlutaMAX™-1 (100X)	gibco	Cat#35050-061
CytoTune™-iPS 2.0 Sendai Reprogramming Kit	invitrogen	Cat#A16517
SB431542	STEMCELL	Cat#72232
CHIR99021	STEMCELL	Cat#75052
Human TGF-β1	peprotech	Cat#100-21-10UG
Collagenase Type IV	gibco	Cat#17104-019
A83-01	STEMCELL	Cat#100-0245
rhWnt-3a	R&D systems	Cat#5036-WN/CF
Insulin solution human	sigma	Cat#SLCF5002
Cyclopamine	STEMCELL	Cat#72072
BAMBANKER	Wako	Cat#302-14681
ACCUTASE	STEMCELL	Cat#7921
Versene(1X)	gibco	Cat#15040-066
Neurobasal medium	gibco	Cat#21103-049
Y-27632	STEMCELL	Cat#72304
Human/Murine/Rat BDNF	peprotech	Cat#450-02-10UG
Human GDNF	peprotech	Cat#450-10-10UG
0.25% Trypsin-EDTA(1X)	gibco	Cat#25200-072
REGM™SingleQuots	Lonza	Cat#CC-4127
Primocin	InvivoGen	Cat#ant-pm
Fetal Bovine Serum, Certified	gibco	Cat#16000-044
Fetal Bovine Serum, Qualified	gibco	Cat#10091-148
Human FGF-8a	peprotech	Cat#100-25A-25UG
VECTASHIELD	vector	Cat#H-100
Mitomycin C	MCE	Cat#HY-13316/CS-0564
Recombinant Human IL-6	gibco	Cat#PHC0065
Recombinant Human FLT-3 Ligand	gibco	Cat#PHC9411
Recombinant Human SCF	gibco	Cat#PHC2111
Recombinant Human IL-3	gibco	Cat#PHC0034
Stempro-34 SFM (1X)	gibco	Cat#10640-019
Heparin sodium salt from porcine intestinal mucosa	sigma	Cat#H3149-500KU-9
Ascorbic Acid	USP	Cat#1043003
Adenosine 3',5'-cyclic	sigma	Cat#A9501-1G
Recombinant Transthyretin/TTR protein	MedChemExpress	HY-P73455
Vitamin A	Solarbio	V8090
Lymphocyte Separation Medium (Human)	Solarbio	P8610
CHIP Assay Kit	Beyotime	P2078
PCR Clean Up Kit/DNA Purification Kit	Beyotime	D0033
Click-iT™ EdU Alexa Fluor™ 488 HCS	Thermo Fisher Scientific	C10350
Bule Substrate Kit, Alkaline Phosphatase	VECTOR	Cat# SK-5300
