# Supplementary figures and images for: A human forebrain organoid model reveals the essential function of GTF2IRD1-TTR-ERK axis for the neurodevelopmental deficits of Williams syndrome
Source: eLife journal article supplement (doi:10.7554/elife.98081), 2024-08-19

Figure 3J

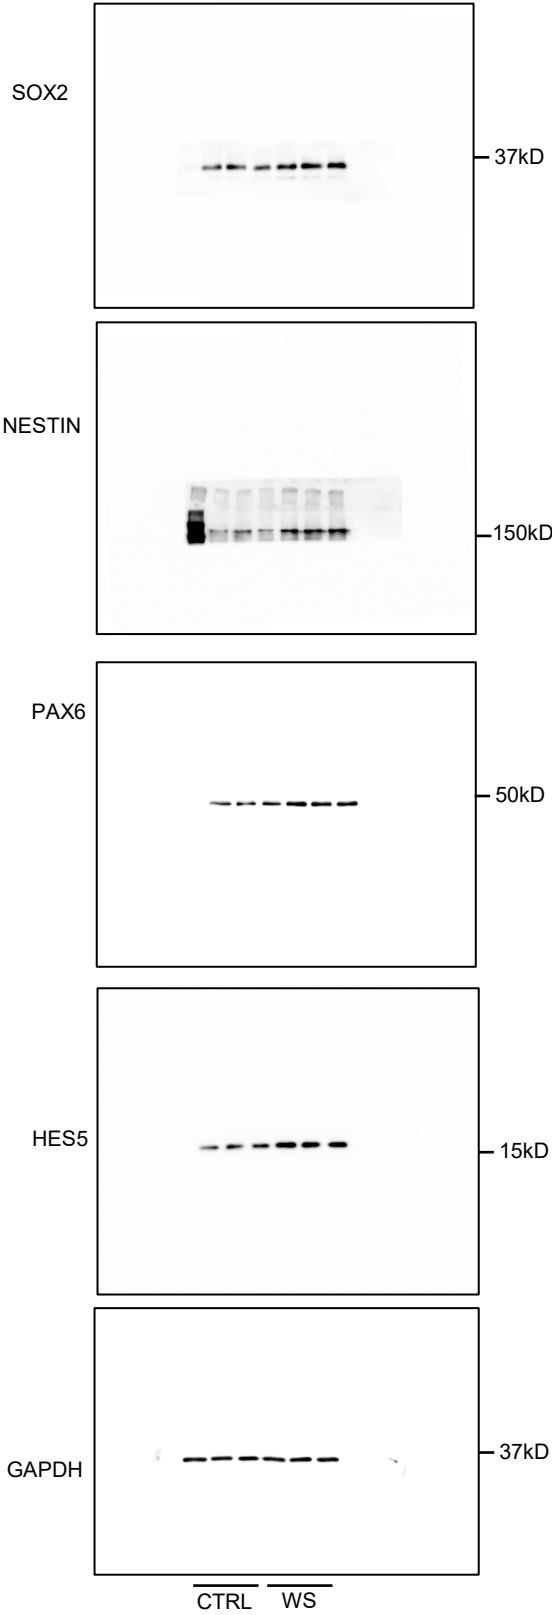

Figure 3O

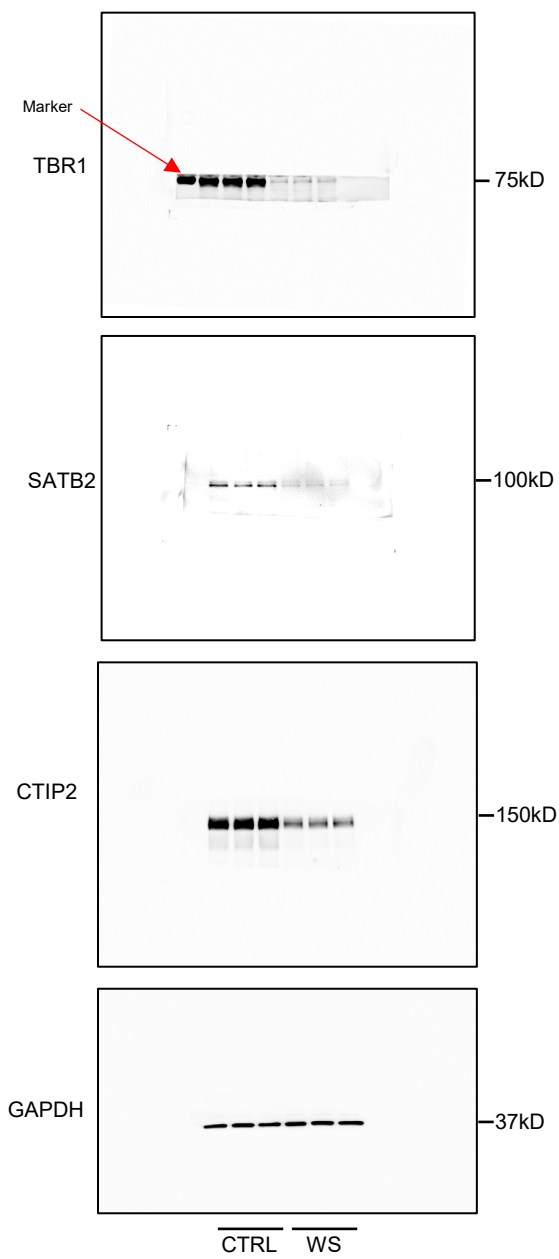

Supplement: fig3-data1 [file elife-98081-fig3-data1-v1.zip]

Figure 6F

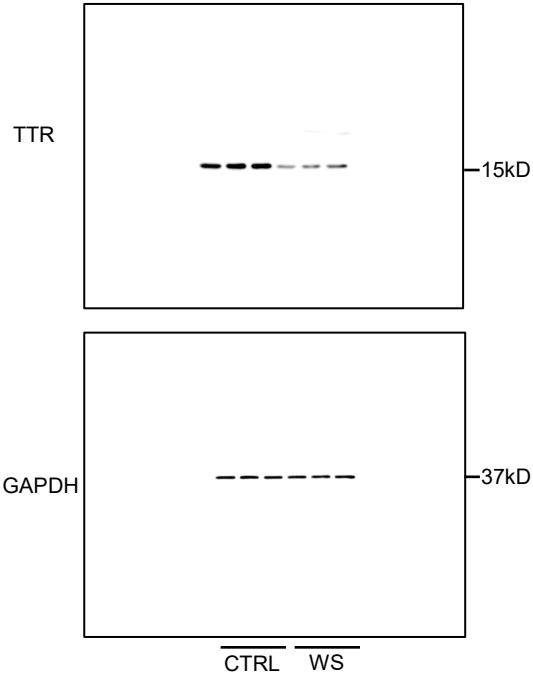

Figure 6I

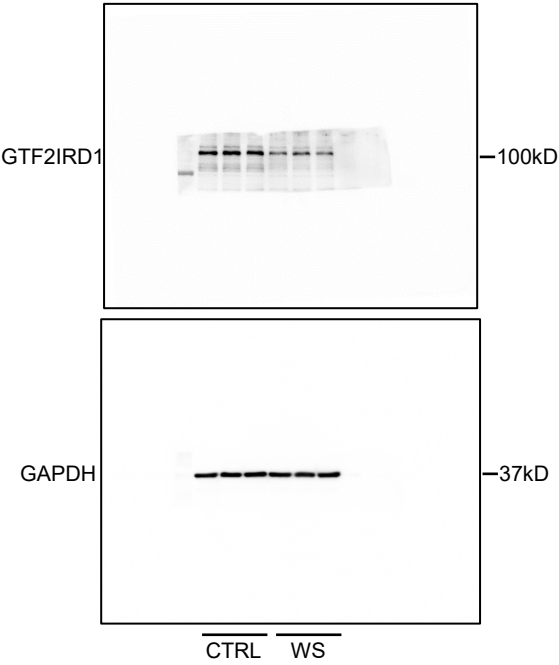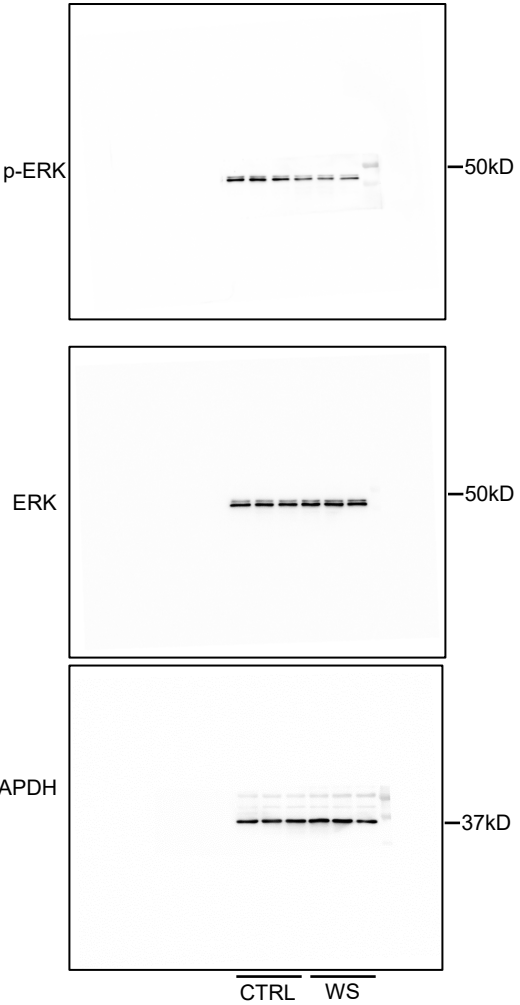

Supplement: fig6-data1 [file elife-98081-fig6-data1-v1.zip]

Figure 7A

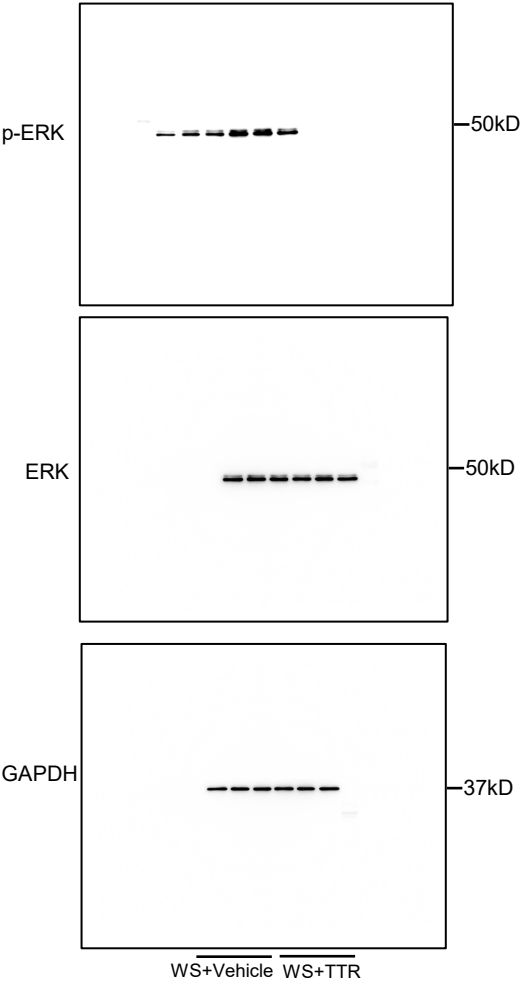

Figure 7D

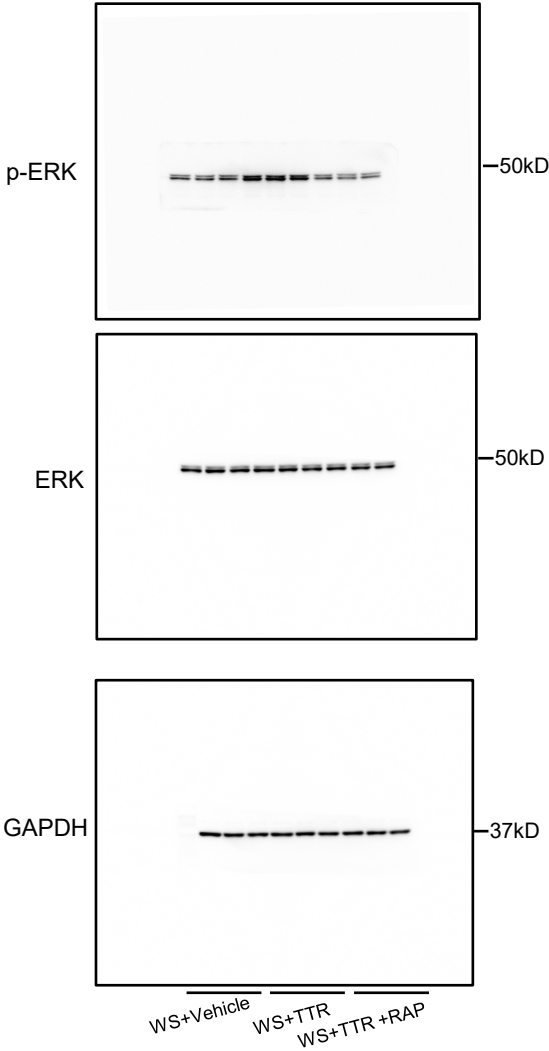

Supplement: fig7-data1 [file elife-98081-fig7-data1-v1.zip]

Figure 8J

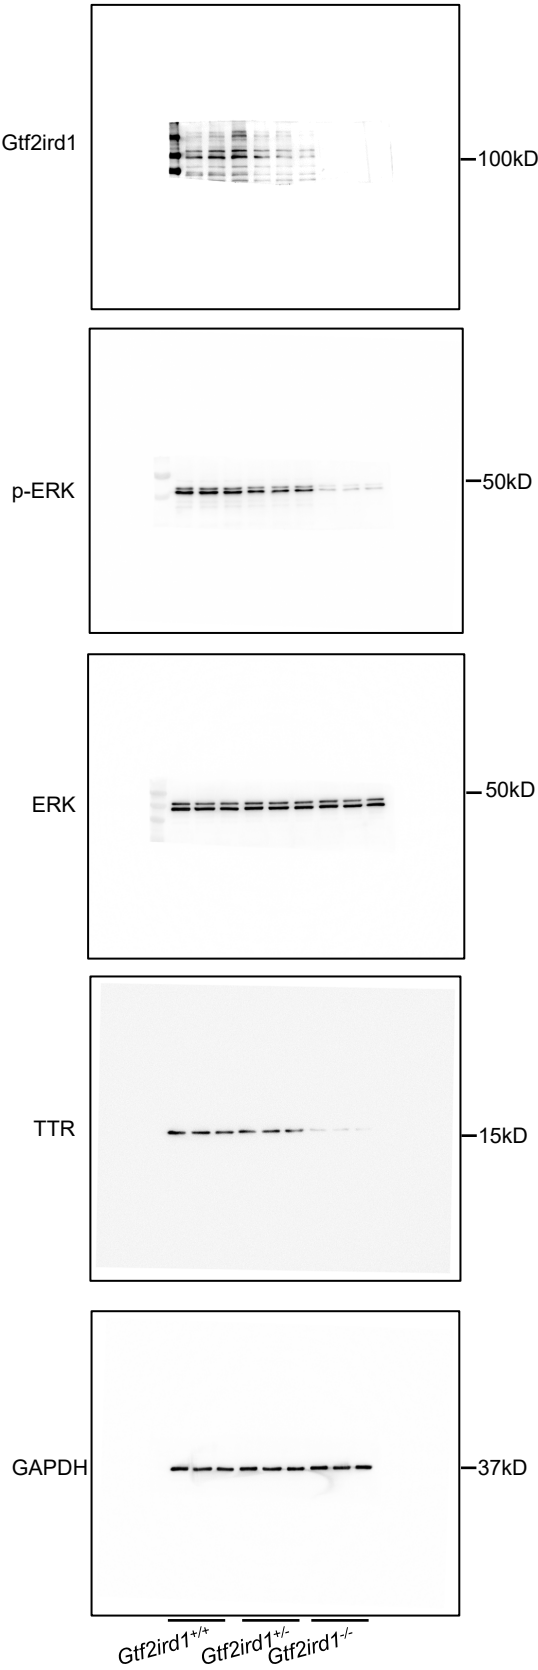

Supplement: fig8-data1 [file elife-98081-fig8-data1-v1.zip]

Figure 9J

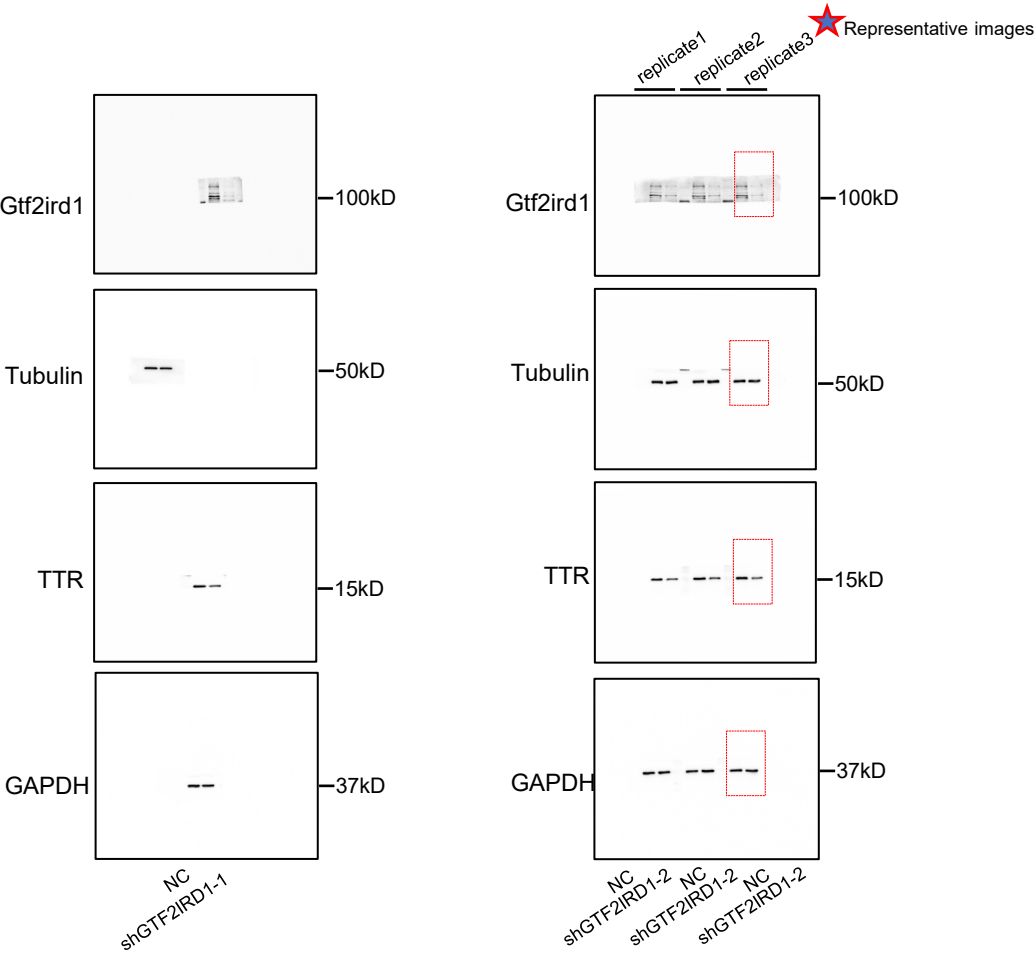

Supplement: fig9-data1 [file elife-98081-fig9-data1-v1.zip]
